# Supplementary material
Source: PubMed Central journal article supplement (PMC4430333)

## **SUPPLEMENTARY FIGURE LEGENDS**

**Suppl. Fig. 1:** Striatal stimulus intensity dependent IPSCs in GP neurons. *A:* An example of eIPSCs recorded in a GP neuron under different intensities (1 V - 20 V) of striatal stimulation. *B:* The amplitude of eIPSCs averaged from 9 GP neurons recorded under different stimulus intensities. *C:* Application of TTX (1  $\mu$ M) blocks eIPSCs recorded in GP neurons after strong striatal stimulation (15 V). *D:* Application of bicuculline (20  $\mu$ M) blocks IPSCs evoked by strong striatal stimulation (15V). *E:* The same neuron presented in (D) shows the time course of eIPSCs amplitude in response to bicuculline application. *F:* Bar graph summarizing the effect of TTX and bicuculline on eIPSCs amplitude expressed as percent of control.

**Suppl. Fig. 2:** (A) Sample trace illustrates that application of bicuculline (20  $\mu$ M) does not have any significant effect on the baseline holding current of GP neurons. Note that sIPSCs are completely abolished by bicuculline confirming that they are mediated by GABA-A receptors. (B) Graph showing the time course of the effects of bicuculline on the baseline holding current in the neuron shown in panel A.

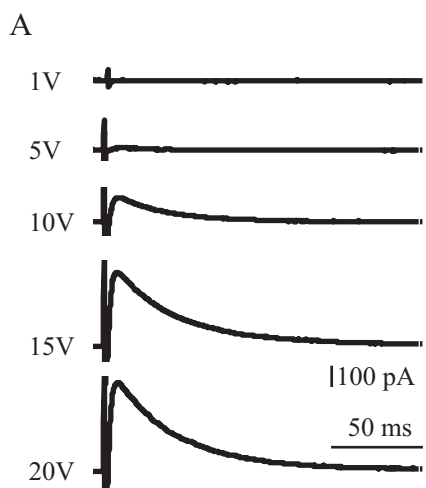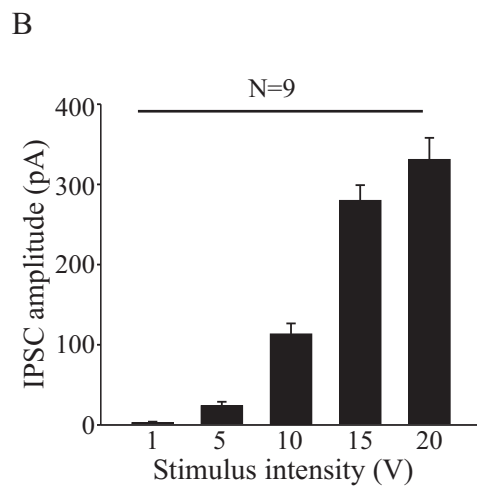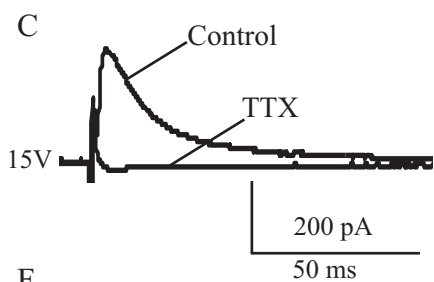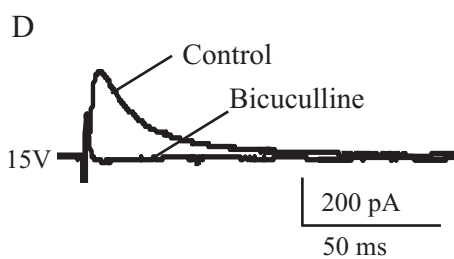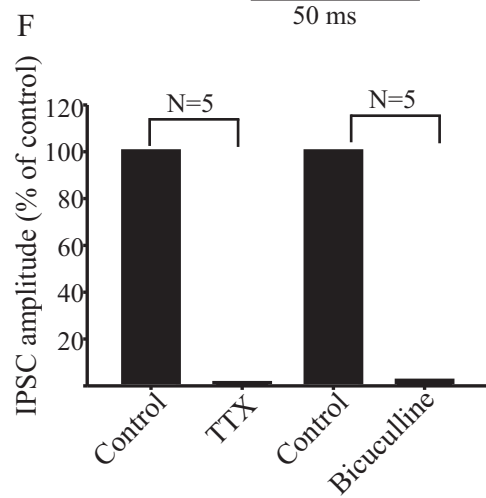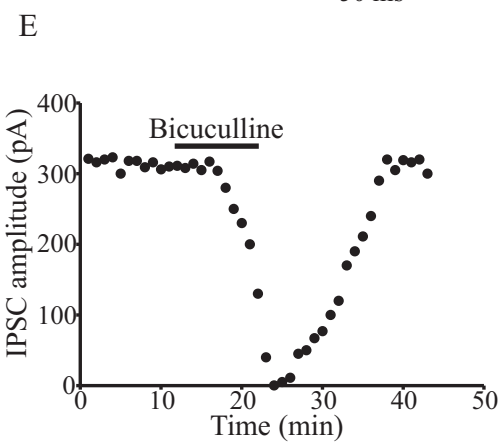

A

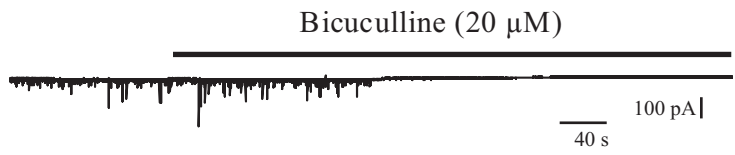

B

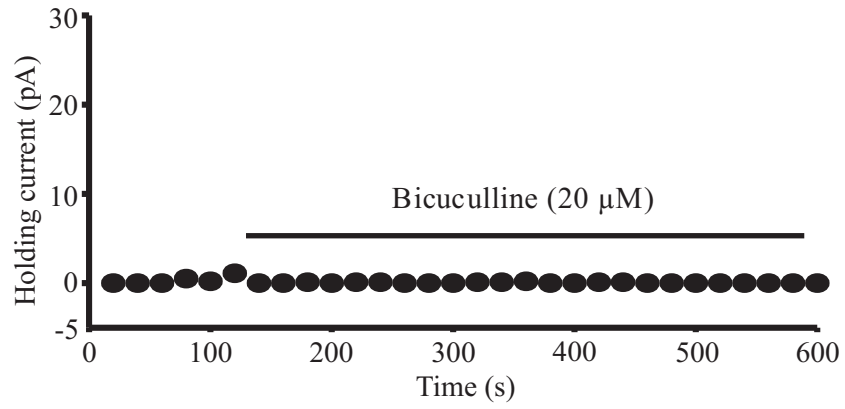

Supplement: NIHMS682707-supplement-1.pdf [file NIHMS682707-supplement-1.pdf]
